# Supplementary material
Source: publisher figshare collection journal article supplement (https://acs.figshare.com/ndownloader/files/5931357)
Supplement: Supplementary file 1 [file 5931357]

# Supporting Information

## Synergistic Cysteamine Delivery Nanowafer as an Efficacious Treatment Modality for Corneal Cystinosis

*Daniela C. Marcano,<sup>a</sup> Crystal S. Shin,<sup>a</sup> Briana Lee,<sup>b</sup> Lucas C. Isenhardt,<sup>a</sup> Xing Liu,<sup>c</sup> Feng Li,<sup>c</sup>  
James Jester,<sup>b</sup> Stephen C. Pflugfelder,<sup>a</sup> Jennifer Simpson,<sup>b\*</sup> Ghanashyam Acharya.<sup>a\*</sup>*

a Department of Ophthalmology, Baylor College of Medicine, Houston, TX

b Department of Ophthalmology, University of California, Irvine, CA

c Metabolomics Core Facility, Baylor College of Medicine, Houston, TX

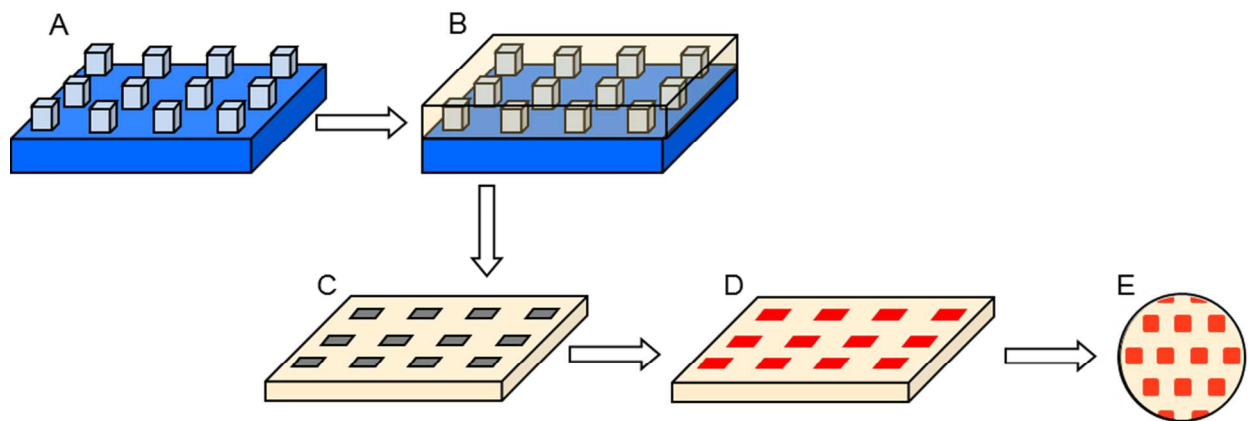

**Figure S1.** Schematic of the nanowafers fabrication *via* the hydrogel template strategy. (A) Silicon wafer master template having 500 nm square posts fabricated by e-beam lithography. (B) Fabrication of a PVA template. (C) PVA template. (D) PVA template filled with drug. (E) A drug filled nanowafers.

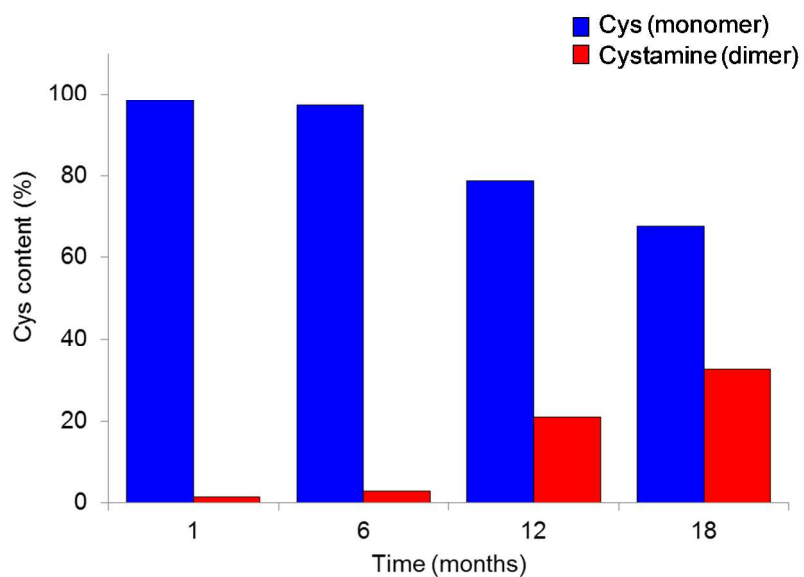

**Figure S2.** Cys-NW protects Cys from oxidation to therapeutically inactive cystamine. A plot depicting the stability of Cys (monomer) in the nanowafer compared to cystamine (dimer).

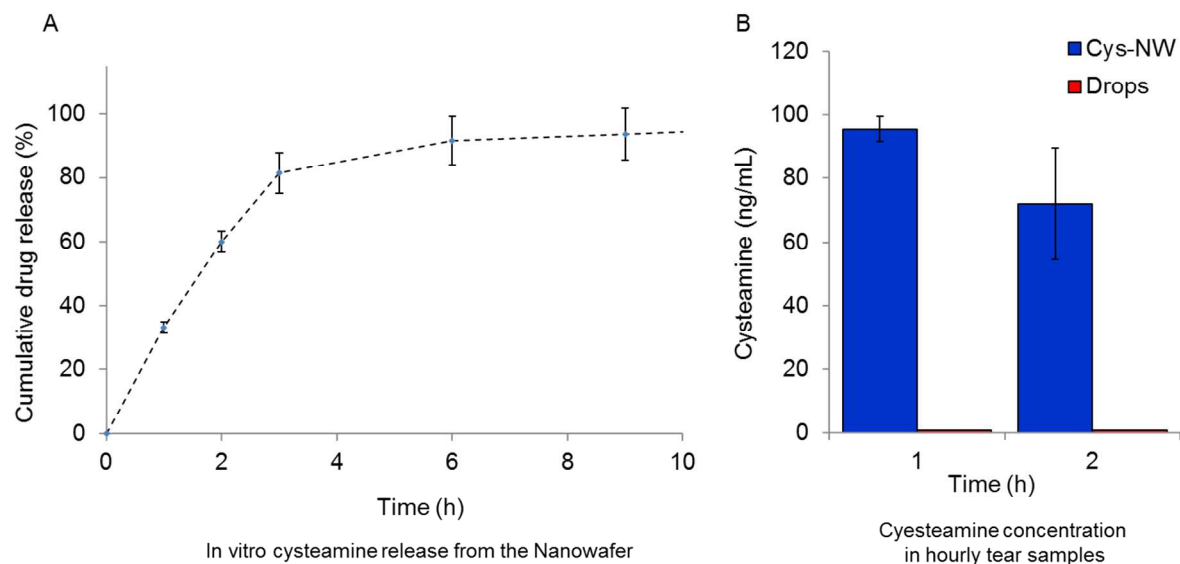

**Figure S3.** Cys-NW improves the drug residence time on the ocular surface. (A&B) Bright field and fluorescence images demonstrating the application of a nanowafer on mouse eye. (C) In vitro drug release profile of Cys-NW. (D) Cys content in the tear samples collected after Cys-NW and Cys eye drop instillation. Data is represented as mean $\pm$ SEM.

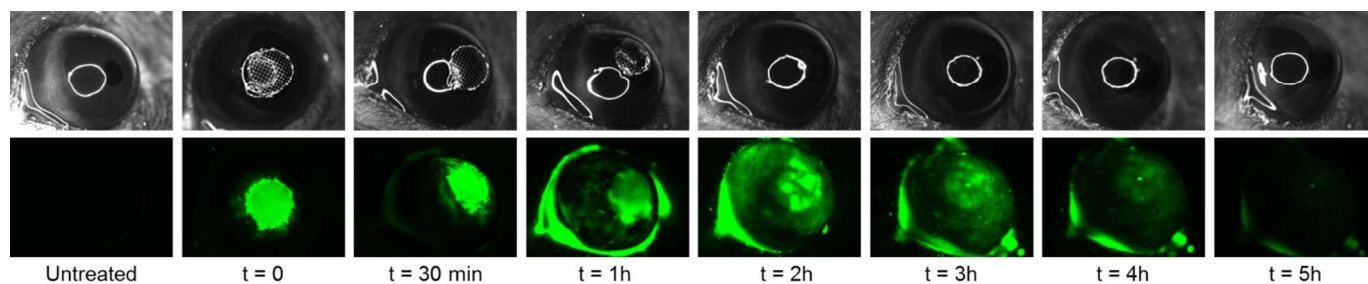

**Figure S4.** Demonstration of adherence and dissolution of the nanowafer during the course of the drug release. Top Panel: Bright field micrographs demonstrating the disappearance of the nanowafer after 1 hour (please see the arrows pointing the position of the nanowafer). Bottom Panel: Fluorescence micrographs demonstrating the presence of fluorescein in the corneal tissue for up to 5 hours.
